# Functional Analysis of the Arabidopsis PAL Gene Family in Plant Growth, Development, and Response to Environmental Stress<sup>1</sup>[W][OA]

Junli Huang<sup>2,3</sup>, Min Gu<sup>2</sup>, Zhibing Lai, Baofang Fan, Kai Shi, Yan-Hong Zhou, Jing-Quan Yu, and Zhixiang Chen\*

Department of Botany and Plant Pathology, Purdue University, West Lafayette, Indiana 47907–2054 (J.H., Z.L., B.F., Z.C.); and Department of Horticulture, Zhejiang University, Hangzhou 310029, People's Republic of China (M.G., K.S., Y.-H.Z., J.-Q.Y.)

Phenylalanine ammonia-lyase (PAL) catalyzes the first step of the phenylpropanoid pathway, which produces precursors to a variety of important secondary metabolites. Arabidopsis (*Arabidopsis thaliana*) contains four PAL genes (*PAL1*–*PAL4*), but there has been no genetic analysis to assess the biological functions of the entire gene family. Here, we report the generation and analysis of combined mutations for the four Arabidopsis PAL genes. Contrary to a previous report, we found that three independent *pal1 pal2* double mutants were fertile and generated yellow seeds due to the lack of condensed tannin pigments in the seed coat. The *pal1 pal2* double mutants were also deficient in anthocyanin pigments in various plant tissues, which accumulate in wild-type plants under stress conditions. Thus, PAL1 and PAL2 have a redundant role in flavonoid biosynthesis. Furthermore, the *pal1 pal2* double mutants were more sensitive to ultraviolet-B light but more tolerant to drought than wild-type plants. We have also generated two independent *pal1 pal2 pal3 pal4* quadruple knockout mutants, which are stunted and sterile. The quadruple knockout mutants still contained about 10% of the wild-type PAL activity, which might result from one or more leaky *pal* mutant genes or from other unknown PAL genes. The quadruple mutants also accumulated substantially reduced levels of salicylic acid and displayed increased susceptibility to a virulent strain of the bacterial pathogen *Pseudomonas syringae*. These results provide further evidence for both distinct and overlapping roles of the Arabidopsis PAL genes in plant growth, development, and responses to environmental stresses.

When the first land plants appeared about 500 million years ago from a pioneer green algal ancestor, they had to face harsh terrestrial environmental conditions, including desiccation, UV radiation, and attack of microbial pathogens (Kenrick and Crane, 1997). The emergence of the phenylpropanoid pathway is among a number of important adaptations that allow land plants to survive under these important stresses (Ferrer et al., 2008). Phenylpropanoid compounds are precursors to a wide range of phenolic compounds with many functions in plants. Lignin, which is synthesized from phenylpropanoid compounds, is a major structural component of secondarily thickened cell

walls in the plant vascular system essential for stem rigidity and for conducting water, minerals, and photosynthetic products through the plant. Phenylpropanoids are also precursors to flavonoids, isoflavonoids, coumarins, and stilbenes. These compounds have important functions in plant defense against pathogens and other predators, as UV light protectants, and as regulatory molecules in signal transduction and communication with other organisms (Ferrer et al., 2008).

Phenylalanine ammonia-lyase (PAL; EC 4.3.1.5) catalyzes the deamination of Phe to give cinnamic acid, which is the first step in the phenylpropanoid pathway and an important regulation point between primary and secondary metabolism. PAL is encoded by a small gene family in plants with four members in Arabidopsis (*Arabidopsis thaliana*; *PAL1*–*PAL4*; Raes et al., 2003). A large number of studies have shown that PAL gene expression is responsive to a variety of environmental stimuli, including pathogen infection, wounding, nutrient depletion, UV irradiation, extreme temperatures, and other stress conditions (Lawton et al., 1983; Edwards et al., 1985; Liang et al., 1989a, 1989b; Dixon and Paiva, 1995). A number of studies have also employed molecular and genetic approaches to silence or disrupt the PAL genes for functional analysis of the gene family in plant growth, development, and responses to environmental stresses. Tobacco (*Nicotiana tabacum*) plants epigenetically suppressed in PAL expression

<sup>1</sup> This work was supported by the National Science Foundation (grant no. MCB-0209819 to Z.C.) and the National Basic Research Program of China (grant no. 2009CB119000 to J.-Q.Y.).

<sup>2</sup> These authors contributed equally to the article.

<sup>3</sup> Present address: College of Bioengineering, Chongqing University, Chongqing 400044, People's Republic of China.

\* Corresponding author; e-mail zhixiang@purdue.edu.

The author responsible for distribution of materials integral to the findings presented in this article in accordance with the policy described in the Instructions for Authors ([www.plantphysiol.org](http://www.plantphysiol.org)) is: Zhixiang Chen ([zhixiang@purdue.edu](mailto:zhixiang@purdue.edu)).

[W] The online version of this article contains Web-only data.

[OA] Open Access articles can be viewed online without a subscription.

[www.plantphysiol.org/cgi/doi/10.1104/pp.110.157370](http://www.plantphysiol.org/cgi/doi/10.1104/pp.110.157370)

exhibited unusual phenotypes such as localized fluorescent lesions, altered leaf shape and texture, reduced lignification in xylem, stunted growth, reduced pollen viability, and altered flower morphology and pigmentation (Elkind et al., 1990). These plants did not develop systemic acquired resistance in response to infection by *Tobacco mosaic virus* (Pallas et al., 1996). More recently, genetic analysis has been conducted on Arabidopsis *PAL1* and *PAL2* genes through phenotypic characterization of both single and double mutants (Rohde et al., 2004). While the *pal1* and *pal2* single mutants have no obvious visible phenotypes in growth and development, the *pal1 pal2* double mutant has limited phenotypic alterations, including infertility, significant reduction in lignin accumulation, and alteration in secondary cell wall ultrastructure (Rohde et al., 2004). Molecular phenotyping revealed significant modifications in the transcriptome and metabolome of the *pal1 pal2* mutant (Rohde et al., 2004).

The abolished systemic acquired resistance in the transgenic tobacco plants with cosuppressed *PAL* expression is associated with reduced accumulation of salicylic acid (SA) in both lower inoculated and upper uninoculated systemic leaves (Pallas et al., 1996). Furthermore, the PAL inhibitor 2-aminoindan-2-phosphonic acid reduced pathogen- or pathogen elicitor-induced SA accumulation in potato (*Solanum tuberosum*), cucumber (*Cucumis sativus*), and Arabidopsis (Meuwly et al., 1995; Mauch-Mani and Slusarenko, 1996; Coquoz et al., 1998). In Arabidopsis, treatment of the PAL inhibitor made the plants completely susceptible to the downy mildew oomycete *Hyaloperonospora parasitica*, which could be restored by SA (Mauch-Mani and Slusarenko, 1996). Based on these results, the authors have suggested that production of SA precursors is a major function of PAL in Arabidopsis downy mildew resistance (Mauch-Mani and Slusarenko, 1996). However, genetic and molecular analyses have indicated that the bulk of SA is synthesized from the isochorismate pathway. Arabidopsis contains two genes encoding isochorismate synthase (ICS). In *ics1* mutants, total SA accumulation is only about 5% to 10% of wild-type levels after infection by the virulent biotroph *Erysiphe* or avirulent strains of *Pseudomonas syringae* (Wildermuth et al., 2001). Upon UV light exposure, the *ics1* mutant accumulated roughly 10% and the *ics1 ics2* double mutant accumulated about 4% of wild-type SA levels (Garcion et al., 2008). SA accumulation in *Nicotiana benthamiana* is also dependent on ICS (Catinot et al., 2008). If a vast majority of SA is synthesized from the ICS pathway, it is unclear how silencing or inhibition of PAL leads to a substantial reduction in SA accumulation and enhanced pathogen susceptibility.

Since only two of the four PAL genes in Arabidopsis have been genetically analyzed (Rohde et al., 2004), the biological functions of the remaining two PAL genes individually or in combination are still unknown. Here, we report the generation and analysis of two independent sets of single, double, triple, and quadruple

T-DNA or transposon insertion mutants for the four Arabidopsis *PAL* genes. We found that *pal1 pal2* double mutants were fertile and generated yellowish seeds due to the lack of condensed tannin pigments in the seed coat. The *pal1 pal2* double mutants were also deficient in anthocyanin pigments in various plant tissues and were highly sensitive to UV-B light. Thus, *PAL1* and *PAL2* have a particularly important and redundant role in flavonoid biosynthesis. The two *pal1 pal2 pal3 pal4* quadruple mutants, which contained almost no detectable transcripts for the four *PAL* genes but still had about 10% of the wild-type PAL activity, were stunted and sterile. The quadruple mutants had greatly reduced levels of lignin and accumulated reduced levels of SA after pathogen infection. These results provide new information about both the distinct and overlapping roles of the Arabidopsis *PAL* genes in plant growth, development, and responses to environmental stresses.

## RESULTS

### Fertility and Pigmentation of the *pal1 pal2* Double Mutants

T-DNA insertion mutants *pal1-1* and *pal2-1* for *PAL1* and *PAL2*, respectively, have been previously isolated and found to have no visible phenotypic alterations (Rohde et al., 2004). The *pal1-1 pal2-1* double mutant was also generated through genetic cross and found to display no major morphological phenotypes either (Rohde et al., 2004). However, the double mutant was male sterile and could not set seeds (Rohde et al., 2004). Since these two reported *pal* mutants were in the Arabidopsis ecotype C24 (Rohde et al., 2004), we identified two new T-DNA insertion mutants each for *PAL1* and *PAL2* in the Arabidopsis ecotype Columbia (Col-0), so their genetic background is identical to that of later isolated *pal3* and *pal4* mutants (see below). The *pal1-2* (Salk\_022804) and *pal1-3* (Salk\_096474) mutants contain a T-DNA insertion in the second exon and first intron of *PAL1*, respectively (Fig. 1A). Both *pal2-2* (Salk\_092252) and *pal2-3* (GABI\_692H09) contain a T-DNA insertion in the first intron of *PAL2* (Fig. 1A). Semiquantitative PCR analysis failed to detect *PAL1* or *PAL2* transcripts in the respective homozygous mutants (Fig. 1B). Real-time PCR showed that the mutants contained less than 1% of the wild-type levels of the *PAL* transcripts (Supplemental Table S1). Like *pal1-1* and *pal2-1* mutants, *pal1-2*, *pal1-3*, *pal2-2*, and *pal2-3* single mutants had no visible morphological phenotypes (data not shown).

We also generated two independent *pal1 pal2* double mutants through genetic crosses. The PAL activity in inflorescence stems of the double mutants was only about 25% to 30% of that of wild-type plants (Fig. 2), similar to that observed in the previously reported *pal1-1 pal2-1* double mutant (Rohde et al., 2004). In addition, like the *pal1-1 pal2-1* double mutant, the *pal1-2 pal2-2* and

**Figure 1.** Structures and mutants for the *PAL* genes. A, Exon and intron structures of the four *PAL* genes. The exons are indicated with rectangles and the introns with lines. The locations of T-DNA or transposon insertions in the *pal* mutants are indicated. B, Expression of *PAL* genes in the wild type and *pal* mutants. Semiquantitative RT-PCR was performed with total RNA isolated from 10-week-old inflorescence stems of the wild type and *pal* single and quadruple mutants. The experiment was repeated twice with similar results.

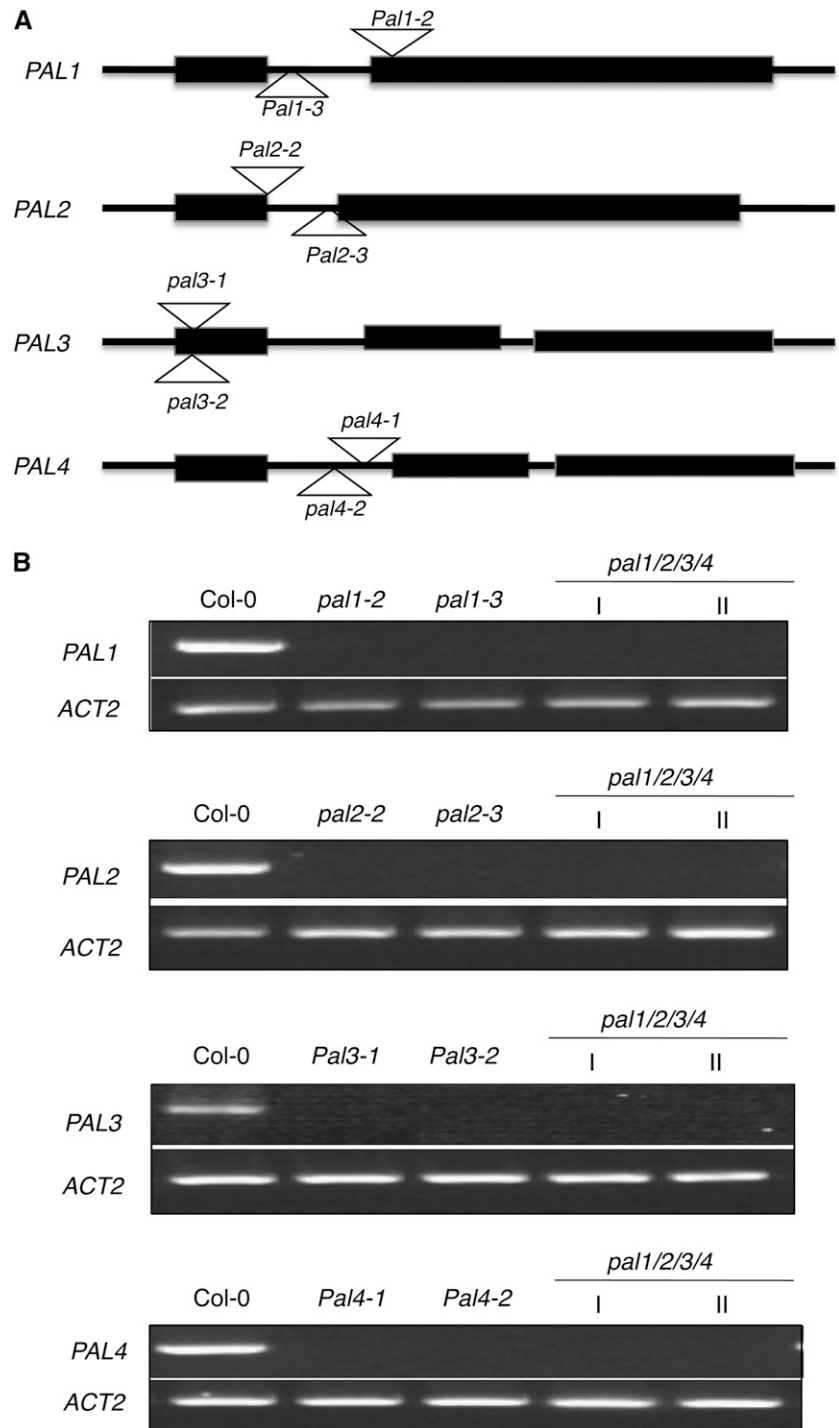

*pal1-3 pal2-3* double mutants displayed no major difference in morphology from the wild type or their respective single mutant plants. However, the double mutants grew significantly slower than wild-type plants, and this difference in growth rate also appeared to be affected by growth conditions. When grown in growth chambers at Purdue University, the *pal1 pal2* double mutants were only slightly smaller than the wild type during the first 3 weeks after germination but could reach the same size as

the wild type as they grew into mature stages. When grown in a growth room at Zhejiang University, the double mutant plants were significantly smaller than wild-type plants throughout the growth stages. Furthermore, while leaves and inflorescences of wild-type plants accumulated anthocyanin pigments at adult and flowering stages, particularly when underfertilized and at a relatively low temperature, no such pigments were observed in the *pal1 pal2* double mutant plants (Fig. 3A).

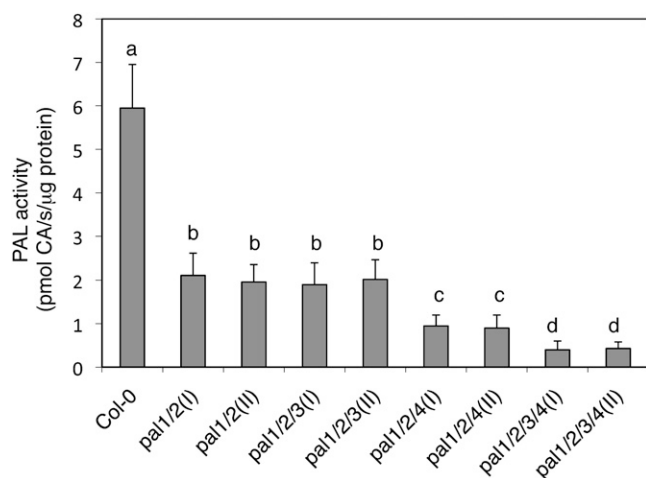

**Figure 2.** PAL activity in the wild type and *pal* mutants. Crude extracts were prepared from 10-week-old inflorescence stems of the wild type and indicated *pal* mutants, and PAL activity was determined with [ $^{14}$ C] Phe and is expressed in pmol cinnamic acid (CA)  $s^{-1} mg^{-1}$  protein. Means and  $\pm$  SE were calculated from average PAL activities determined from three experiments with five plants per experiment for each genotype. According to Duncan's multiple range test ( $P = 0.05$ ), means of PAL activities do not differ significantly if they are indicated with the same letter.

It has been previously reported that the *pal1-1 pal2-1* double mutant is sterile (Rohde et al., 2004). Surprisingly, the *pal1-2 pal2-2* and *pal1-3 pal2-3* double mutants were fertile when grown in growth chambers at Purdue University and at Zhejiang University (Fig. 3B). The double mutants generated yellow seeds (Fig. 3C) due to the lack of tannin pigments in the seed coat. Tannin pigments are produced from polymerization and oxidation of uncolored proanthocyanidins, which can be detected in immature seeds by their dark red staining with vanillin (Debeaujon et al., 2000). Indeed, immature seeds from wild-type plants turned dark red, but the immature seeds from the *pal1 pal2* double mutants showed very little staining when incubated with acidic vanillin (Fig. 3D). The yellow seeds from the double mutants germinated and grew into fertile plants, which again produced yellow seeds.

The difference in fertility between our double mutants and the previously reported *pal1-1 pal2-1* double mutant could be due to differences in their genetic background (C24 versus Col-0) and T-DNA insertions. To distinguish among these possibilities, we requested and obtained *pal1-1 pal2-1* double mutant seeds homozygous for *pal1-1* but heterozygous for *pal2-1*. The double homozygous mutant plants were subsequently identified from their progeny by PCR using gene-specific primers flanking the insertion sites. Unlike Col-0 wild-type plants, C24 wild-type plants had little anthocyanin pigments in leaf veins of mature plants but accumulated visible pigments in the basal stem of inflorescence (Supplemental Fig. S1A). In the *pal1 pal2-1* double mutant, however no such anthocyanin pigments were observed (Supplemental Fig. S1A). Fur-

thermore, the *pal1-2 pal2-2* double mutants in the C24 background were also fertile when grown in growth chambers at Purdue University and generated yellow

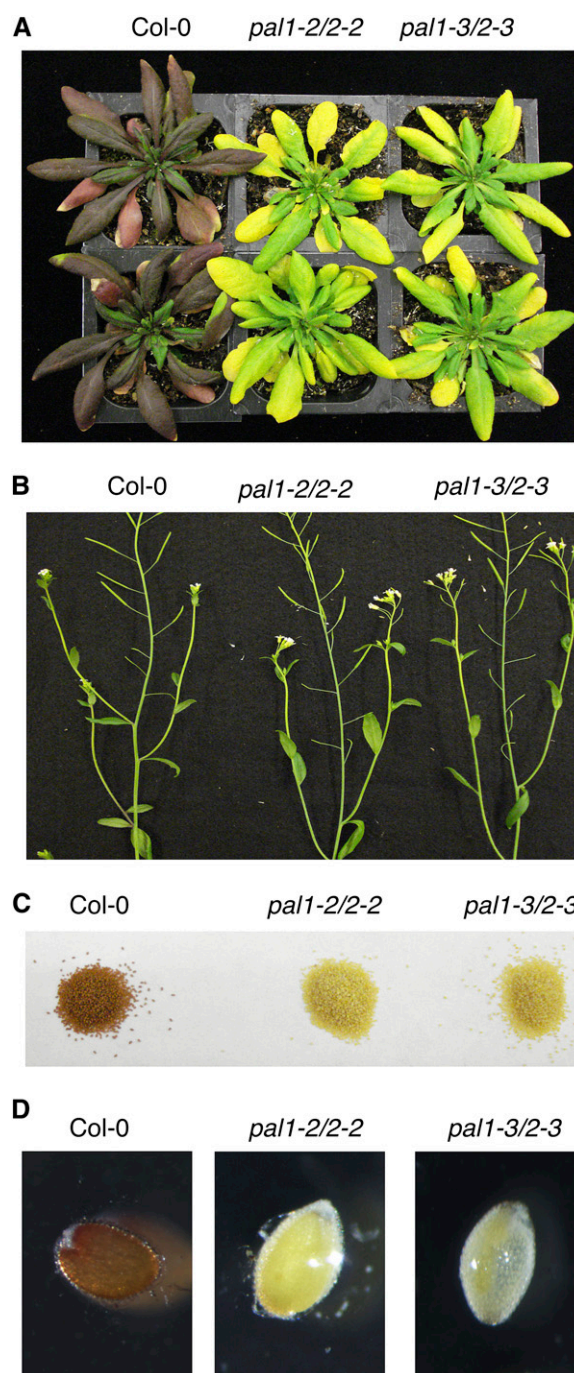

**Figure 3.** Phenotypes of the *pal1 pal2* double mutants. A, Lack of anthocyanin pigments in the *pal1 pal2* double mutants. Wild-type and *pal1 pal2* double mutant plants were grown in soil without fertilization at 19°C under a 12-h-light/12-h-dark photoperiod. The photograph was taken about 8 weeks after germination. B, Inflorescences and siliques of wild-type and *pal1 pal2* double mutant plants. C, Seeds of wild-type and *pal1 pal2* double mutant plants. D, Vanillin staining of immature seeds for detection of catechins and proanthocyanidins.

seeds just like the *pal1-2 pal2-2* and *pal1-3 pal2-3* double mutants in the Col-0 background (Supplemental Fig. S1, B and C). These results indicate that the fertility of the *pal1 pal2* mutants is affected by the growth conditions.

We grew our *Arabidopsis* plants in both the United States and China at a light intensity of  $120 \mu\text{E m}^{-2} \text{s}^{-1}$ , while the previously reported study of the *pal1-1* and *pal2-1* mutants used a lower light intensity ( $50 \mu\text{E m}^{-2} \text{s}^{-1}$ ; Rohde et al., 2004). To determine whether the difference in light intensity is responsible for the fertility difference between the two studies, we first grew the Col-0 wild-type and *pal1 pal2* double mutant plants at  $120 \mu\text{E m}^{-2} \text{s}^{-1}$  until they started to flower. The flowering plants were then divided into two groups, with one group kept at  $120 \mu\text{E m}^{-2} \text{s}^{-1}$  and the other group transferred to  $50 \mu\text{E m}^{-2} \text{s}^{-1}$ . When grown at  $120 \mu\text{E m}^{-2} \text{s}^{-1}$ , the *pal1 pal2* double mutants produced approximately 11% of wild-type pollen grains (Supplemental Table S2) and were fertile (Supplemental Fig. S2). However, those *pal1 pal2* double mutant plants that were transferred to  $50 \mu\text{E m}^{-2} \text{s}^{-1}$  produced few pollen grains (Supplemental Table S2) and were sterile (Supplemental Fig. S2).

#### Enhanced Sensitivity of *pal1 pal2* Double Mutants to UV-B Light

UV-B radiation is an integral part of sunlight and can cause damage to the genome and photosynthetic machinery of plants. We compared the two *pal1 pal2* double mutants with wild-type plants for sensitivity to short-term UV-B light treatment. As shown in Figure 4, exposure of wild-type plants to  $1.24 \mu\text{mol m}^{-2} \text{s}^{-1}$  UV-B light for 4 h did not cause apparent injury or foliar dehydration. By contrast, both *pal1 pal2* double mutant plants exhibited extensive wilting due to foliar dehydration after such a short-term UV-B light exposure (Fig. 4). Thus, disruption of both *PAL1* and *PAL2* caused increased sensitivity to UV-B radiation.

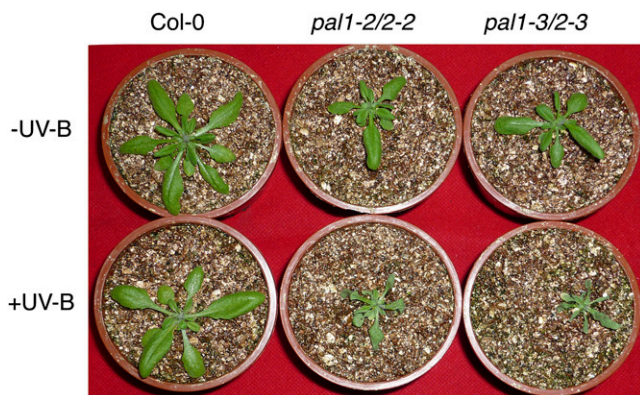

**Figure 4.** Enhanced sensitivity of the *pal1 pal2* double mutants to short-term UV-B light treatment. Four-week-old wild-type and *pal1 pal2* double mutant plants were irradiated with  $1.24 \mu\text{mol m}^{-2} \text{s}^{-1}$  UV-B light for 4 h. The photograph was taken 1 d after UV-B light treatment. The experiment was repeated twice with similar results.

UV-B radiation has harmful effects on various biological processes in plants, including PSII. A number of studies have shown that UV-B light causes severe damage to PSII electron transport activity but no or little effects on PSI (Vass et al., 1999; Booij-James et al., 2000; Segui et al., 2000; Waring et al., 2006). To further determine increased sensitivity of the *pal1 pal2* double mutants to UV-B light treatment, we compared wild-type and double mutant plants for the effects of UV-B on the efficiency of PSII photochemistry and photoprotection. As shown in Figure 5, without UV-B light treatment there was no significant difference between the wild type and double mutants in maximum quantum yield of PSII ( $F_v/F_m$ ), quantum yield of PSII ( $\Phi_{\text{PSII}}$ ), photochemical quenching ( $q_p$ ), and nonphotochemical quenching coefficient (NPQ).  $F_v/F_m$ ,  $\Phi_{\text{PSII}}$ , and  $q_p$  are indicators of PSII photochemistry, while NPQ is an indicator of photoprotection. After 4 h of UV-B light treatment,  $F_v/F_m$ ,  $\Phi_{\text{PSII}}$ ,  $q_p$ , and NPQ of wild-type plants decreased by 22%, 38%, 18%, and 12%, respectively (Fig. 5). On the other hand, UV-B light treatment caused more than 70% reduction of  $F_v/F_m$ , almost 90% reduction in  $\Phi_{\text{PSII}}$  and  $q_p$ , and more than 20% reduction in NPQ of the *pal1 pal2* mutants (Fig. 5). Thus, the capacity of PSII photochemistry and photoprotection was much more compromised by UV-B light treatment in the double *pal1 pal2* mutants than in wild-type plants.

#### Enhanced Tolerance of *pal1 pal2* Double Mutants to Drought

The availability of the *pal1 pal2* double mutants allowed us to determine their phenotypes in tolerance to a variety of abiotic stress conditions. However, when assessed in a growth medium containing various concentrations of NaCl or polyethylene glycol, we found no significant difference between the wild type and double mutants in tolerance to salt or osmotic stress. For testing drought tolerance, we transferred 7-week-old *Arabidopsis* plants into a walk-in growth chamber with approximately 50% humidity. The *pal1 pal2* double mutant plants were significantly smaller than wild-type plants during the first 3 weeks after germination, and we chose relatively old plants for the drought tolerance test to ensure that all tested plants had similar sizes and fresh weights. The plants were unwatered and observed for drought stress symptoms. As shown in Figure 6, wild-type plants showed extensive wilting about 2 weeks after watering was stopped. The two *pal1 pal2* double mutants were still brightly green and exhibited only very minor wilting (Fig. 6). Thus, disruption of *PAL1* and *PAL2* increased plant tolerance to drought stress.

#### Generation of *pal1 pal2 pal3 pal4* Quadruple T-DNA Insertion Mutants

We also identified two T-DNA insertion mutants each for *PAL3* and *PAL4*. Both *pal3-1* (SM\_3.39574) and *pal3-2* (SM\_3.19684) contain a transposon insertion in

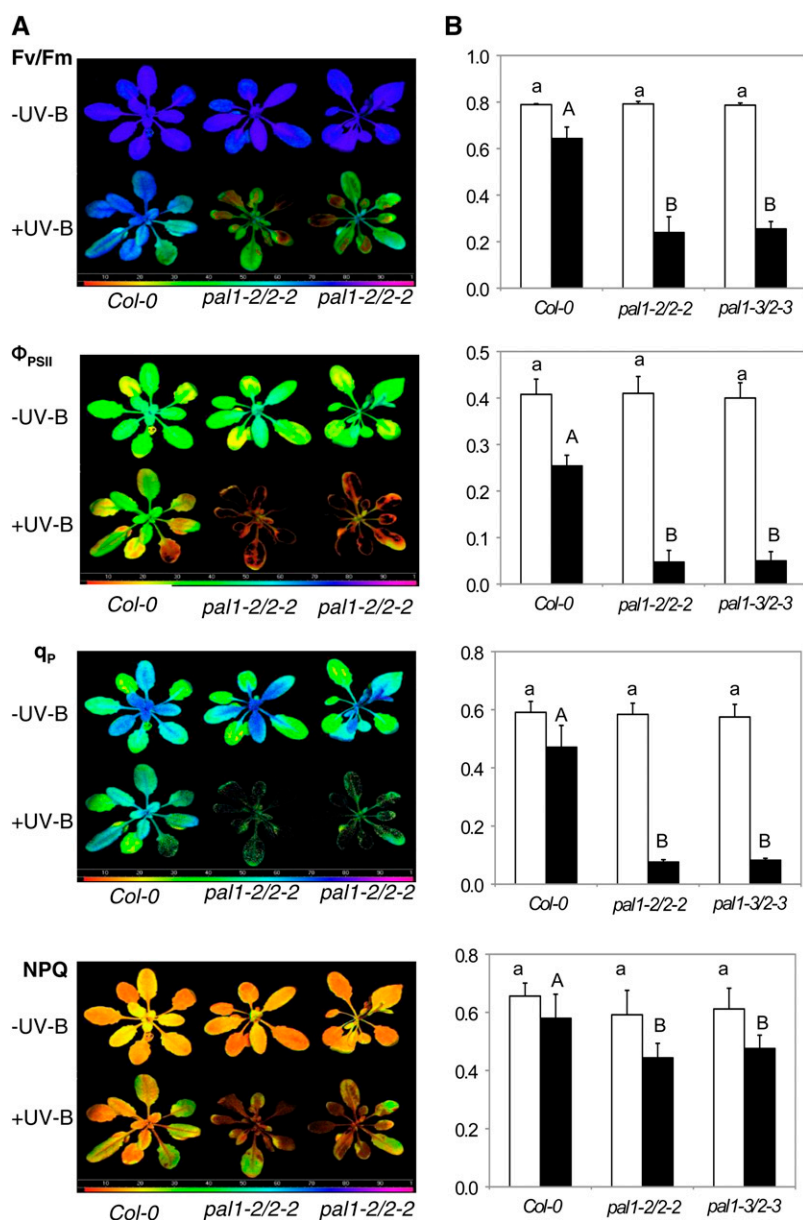

**Figure 5.** Enhanced sensitivity of the effects of UV-B light on the efficiency of PSII photochemistry and photoprotection between wild-type and double mutant plants. A, Images of  $F_v/F_m$ ,  $\Phi_{PSII}$ ,  $q_p$ , and NPQ of plants before and after exposure to UV-B light at  $1.24 \mu\text{mol m}^{-2} \text{s}^{-1}$  for 4 h. Chlorophyll fluorescence images were taken immediately after UV-B light treatment. The false color code depicted at the bottom of the images ranged from 0 (black) to 1.0 (purple). B, Average values for the respective chlorophyll fluorescence images. Data are means of five replicates ( $\pm$ SD). According to Duncan's multiple range test ( $P = 0.05$ ), means of the photosynthetic parameters do not differ significantly before UV-B light exposure if they are indicated with the same lowercase letter and do not differ significantly after UV-B light exposure if they are indicated with the same uppercase letter.

the first exon of *PAL3* (Fig. 1A). Both *pal4-1* (Salk\_070702) and *pal4-2* (Salk\_022730) contain a T-DNA insertion in the first intron of *PAL4* (Fig. 1A). Semi-quantitative PCR analysis failed to detect *PAL3* or *PAL4* transcripts in the respective homozygous mutants, suggesting that they are null (Fig. 1B). Real-time PCR showed that the mutants contained 0.3% to 1.2% of the wild-type levels of the respective *PAL* transcripts (Supplemental Table S1). No visible morphological phenotypes were observed in these *pal3* and *pal4* single mutants (data not shown).

To analyze the biological functions of the entire PAL gene family, we generated triple and quadruple mutants for the four *PAL* genes through genetic crossing. The two *pal1 pal2 pal3* triple mutants had levels of residual PAL activities similar to those of the *pal1 pal2* double mutants (Fig. 2). Both triple mutants were also

fertile when grown in growth chambers at Purdue University and generated yellow seeds (data not shown). On the other hand, the PAL activity in inflorescence stems of the *pal1 pal2 pal4* triple mutants was only about 12% to 15% of wild-type levels, compared with about 25% of wild-type levels of PAL activity in the *pal1 pal2* double and *pal1 pal2 pal3* triple mutants (Fig. 2). In addition, the *pal1 pal2 pal4* triple mutant plants were stunted and sterile.

We also generated two independent *pal1 pal2 pal3 pal4* quadruple mutants. Reverse transcription (RT)-PCR analysis failed to detect transcripts for the four *PAL* genes in homozygous quadruple mutant plants (Fig. 1B). Real-time PCR showed that the mutants contained 0.4% to 1.1% of the wild-type levels of the respective *PAL* transcripts (Supplemental Table S1). However, in both quadruple mutants, there was still

about 7% to 9% residual PAL activity in inflorescence stems (Fig. 2). Although stunted and sterile, both quadruple mutants were viable and exhibited no grossly altered morphological phenotypes (Fig. 7A).

#### Lignin Analysis of the *pal1 pal2 pal3 pal4* Quadruple Mutants

The two quadruple mutant plants produced rigid inflorescence stems that were reduced in length (Fig. 7A). To analyze the defects of the quadruple mutants in lignin accumulation, we first used histochemical staining of hand sections of fresh basal rachis segments of 3-month-old plants using the phloroglucinol/HCl reagent. In the wild type, the walls of xylem cells exhibited an intensely bright red when stained with phloroglucinol/HCl (Fig. 7B). Both quadruple mutants showed a positive red color with distribution similar to that of the wild type (Fig. 7B). However, the color of the positively stained material was greatly reduced in the quadruple mutants when compared with that of the wild type (Fig. 7B).

To obtain a more quantitative analysis of the lignin content, we isolated cell wall and measured lignin contents using the acetyl bromide method of inflorescence stems of 10-week-old wild-type and *pal1 pal2 pal3 pal4* quadruple mutant plants. As shown in Figure 7C, the two quadruple mutants had about 20% to 25% of wild-type levels of lignin contents. These results were consistent with those from the histochemical lignin staining: lignin was present but at greatly reduced levels in the quadruple mutants.

#### SA Analysis of the *pal1 pal2 pal3 pal4* Quadruple Mutants

To determine the effect of *PAL* mutations on pathogen-induced SA accumulation, we compared the wild type and various *pal* double, triple, and quadruple

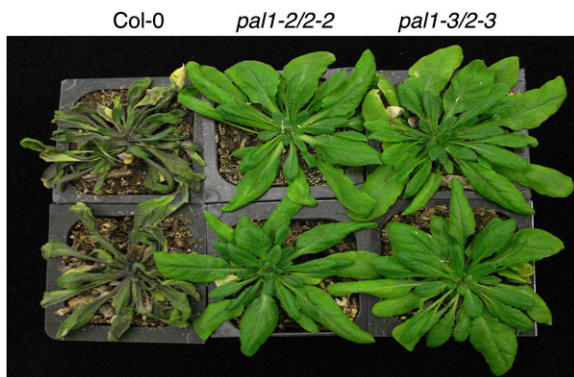

**Figure 6.** Enhanced drought tolerance of the *pal1 pal2* mutants. Seven-week-old Arabidopsis plants (eight plants for each genotype) were moved into a walk-in growth chamber with approximately 50% humidity. The photograph of representative plants was taken 2 weeks after withholding watering. The experiment was repeated twice with similar results.

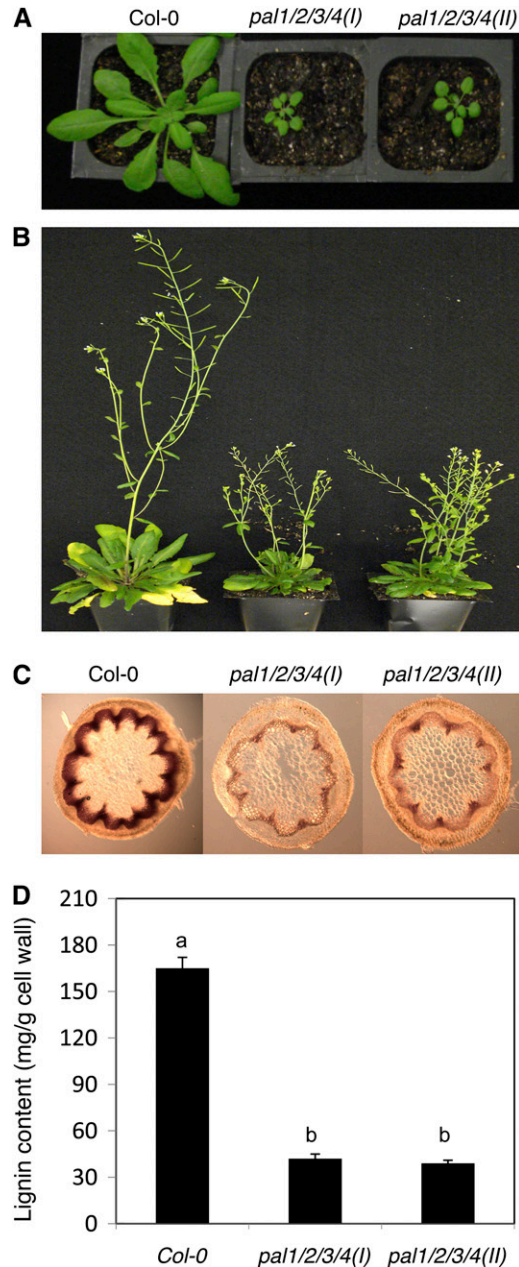

**Figure 7.** Phenotypes of the *pal1 pal2 pal3 pal4* quadruple mutants. A, Six-week-old wild-type and *pal1 pal2 pal3 pal4* quadruple mutant plants. B, Flowering plants of the wild type and *pal1 pal2 pal3 pal4* quadruple mutants. C, Lignin staining with phloroglucinol/HCl in the basal part of 3-month-old inflorescence stems of wild-type and *pal1 pal2 pal3 pal4* quadruple mutant plants. D, Lignin content of 3-month-old inflorescence stems of wild-type and *pal1 pal2 pal3 pal4* quadruple mutant plants. Lignin content was determined as acetyl bromide-soluble lignin. Means and SE were calculated from three average lignin contents determined from three experiments with five plants per experiment for each genotype. According to Duncan's multiple range test ( $P = 0.05$ ), means of lignin contents do not differ significantly if they are indicated with the same letter.

ple mutants for total SA contents before and after infection of an avirulent strain of the bacterial pathogen *P. syringae* pv *tomato* DC3000 (*Pst* DC3000 *avrRpt2*). As shown in Figure 8A, before infection, there was no significant difference in total SA content between the wild type and the *pal1 pal2* double or *pal1 pal2 pla4* triple mutants. On the other hand, the basal SA levels in the two *pal1 pal2 pal3 pal4* quadruple mutants were only about 25% of wild-type levels (Fig. 8B). At 24 h after infection by the avirulent pathogen, there was approximately 17-fold induction in the total SA levels in wild-type plants. Again, the total SA contents after the pathogen infection in the *pal1 pal2* double or *pal1 pal2 pla4* triple mutants were similar to those in the wild-type plants. In the two *pal1 pal2 pal3 pal4* qua-

druple mutants, the total SA levels were about 50% of wild-type levels after the pathogen infection.

### Responses to Pathogen Infection

To determine whether mutations of the *PAL* genes affected plant disease resistance, we compared the wild type and the *pal* mutants for responses to microbial pathogens. First, we determined the *pal* mutants for responses to the necrotrophic fungal pathogen *Botrytis cinerea* but found no significant alteration with both the *pal1 pal2* double and *pal1 pal2 pal3 pal4* quadruple mutants when compared with wild-type plants (Supplemental Fig. S3). We also compared the *pal* double and quadruple mutants with wild-type plants for responses to the virulent strain of *Pst* DC3000. When inoculated at a relatively high dosage with the bacterial pathogen (optical density at 600 nm [OD<sub>600</sub>] = 0.001), we observed no significant difference between the wild type and the *pal* mutants in disease symptom development. However, at 3 d post inoculation with a low dosage of the bacterial pathogen (OD<sub>600</sub> = 0.0002), the two *pal1 pal2* double mutants had a slight but detectable enhancement in disease symptoms when compared with those in the wild type (Fig. 9A). The double mutant plants also displayed a significantly greater bacterial growth (4- to 5-fold) than wild-type plants (Fig. 9B). The two *pal1 pal2 pal3 pal4* quadruple mutants exhibited even greater disease symptoms (Fig. 9A) and bacterial growth (10- to 12-fold; Fig. 9B) than wild-type plants.

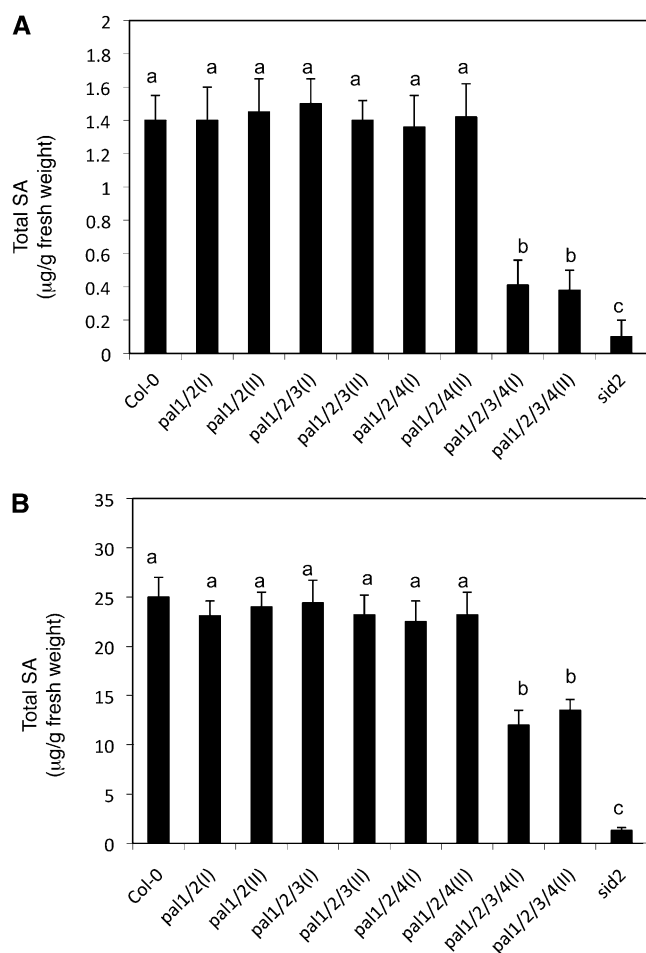

**Figure 8.** Basal and pathogen-induced accumulation of total SA. A, Basal SA contents in wild-type (Col-0) and mutant plants. B, Pathogen-induced SA contents in wild-type (Col-0) and mutant plants. Plants were infiltrated with avirulent *Pst* DC3000 *avrRpt2* (OD<sub>600</sub> = 0.02 in 10 mM MgCl<sub>2</sub>). Inoculated leaves were harvested 24 h later for total SA determination. Means and SE were calculated from average SA contents determined from three experiments with four to six plants per experiment for each genotype. According to Duncan's multiple range test ( $P = 0.05$ ), means of SA contents do not differ significantly if they are indicated with the same letter.

### DISCUSSION

*PAL* genes are among the most extensively studied plant genes, particularly with respect to their response in expression to a variety of environmental conditions. Attempts have also been made to address the biological functions of the *PAL* genes through silencing of *PAL* genes in tobacco and disruption of the *PAL1* and *PAL2* genes in Arabidopsis. To determine the biological functions of the entire *PAL* gene family, we have generated two independent sets of single, double, triple, and quadruple T-DNA/transposon insertion mutants for the four Arabidopsis *PAL* genes. Our analysis of these mutants has generated new and important information about the diverse roles of the gene family in plant growth, development, and responses to environmental conditions.

#### Roles of PAL1 and PAL2 in Flavonoid Synthesis and UV-B Light Protection

Previously, Rohde et al. (2004) isolated and characterized T-DNA insertion mutants *pal1-1* and *pal2-1* for Arabidopsis *PAL1* and *PAL2*, respectively. These authors reported that the *pal1-1* and *pal2-1* single mutants lacked clear phenotypic alterations. The *pal1-1 pal2-1* mutant had no gross morphological phenotypes either



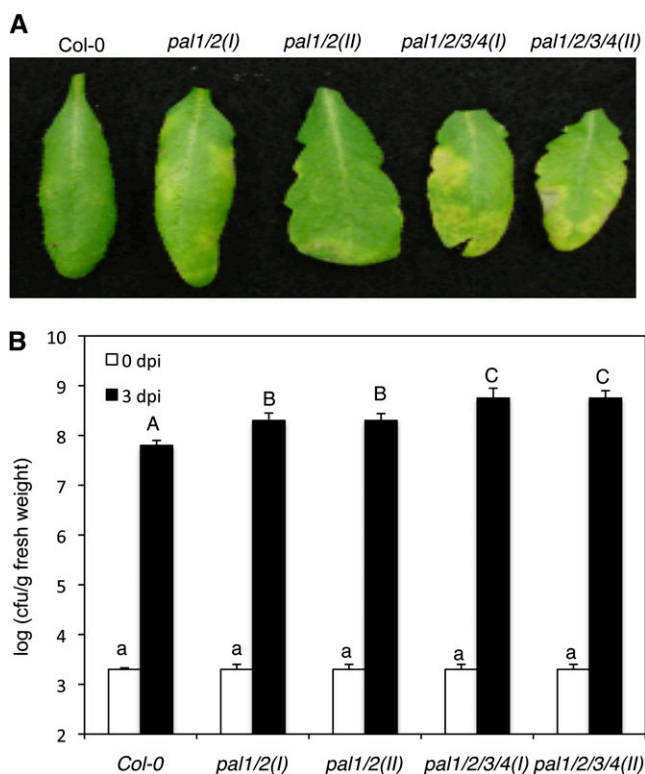

**Figure 9.** Responses of *Arabidopsis pal* mutants to *P. syringae*. A, Disease symptom development. Plants were infiltrated with a suspension of *Pst* DC3000 ( $OD_{600} = 0.0002$  in  $10\text{ mM MgCl}_2$ ). Photographs of representative inoculated leaves were taken at 3 d post inoculation (dpi). B, Altered bacterial growth. Pathogen inoculation was performed as in A. Samples were taken at 0 dpi (white bars) or 3 dpi (black bars) to determine the growth of the bacterial pathogen. Means and  $\pm$  SE were calculated from 10 plants for each treatment. According to Duncan's multiple range test ( $P = 0.05$ ), means of colony-forming units (cfu) at 0 dpi do not differ significantly if they are indicated with the same lowercase letter and means of colony-forming units at 3 dpi do not differ significantly if they are indicated with the same uppercase letter.

but became sterile. However, the transcriptome and metabolome of the *pal* mutants were significantly modified. Disruption of the two *PAL* genes altered the expression of genes involved in phenylpropanoid biosynthesis and carbohydrate and amino acid metabolism (Rohde et al., 2004). Phe was overaccumulated, but three major flavonol glucosides and lignin monomers were significantly reduced (Rohde et al., 2004). In this study, we isolated two additional T-DNA insertion mutants for *PAL1* and *PAL2* and provide new insights into the critical roles of the two *PAL* genes. Unlike previous reports with the *pal1-1 pal2-1* double mutant, the *pal1-2 pal2-2* and *pal1-3 pal2-3* double mutants are fertile (Fig. 3B). The difference in the fertility among the *pal1 pal2* double mutants is most likely caused by the difference in light intensity used in the two studies, because the *pal1-1 pal2-1* double mutant was also fertile under our growth conditions (Supplemental Fig. S1B). Thus, disruption of *PAL1* and *PAL2* renders

the fertility of the mutant plants particularly sensitive to environmental growth conditions.

The *pal1 pal2* mutants had approximately 30% of wild-type PAL activity (Fig. 2; Rohde et al., 2004), and the *pal1-1 pal2-2* double mutant contained about 30% of wild-type levels of lignin in the inflorescence stems (Rohde et al., 2004). Lignin plays a crucial role in conducting water in plant stems. The polysaccharide compounds of cell walls of water-conducting tracheids and vessel elements of xylem tissues in vascular plants are highly hydrophilic. The cross-linking of cell wall polysaccharides by lignin, which is more hydrophobic, reduces water absorption to the cell wall and makes it possible for the plant vascular tissues to conduct water efficiently (Boudet, 2007). The cross-linking also enhances both whole-plant structural support and resistance to cell collapse under the tension of water transport (Boyce et al., 2004). The reduced lignin contents in the double mutants might lead a plant's vascular tissue to transport water at a reduced efficiency and consequently to enhanced drought tolerance, as observed in the *pal1 pal2* double mutants (Fig. 6). Further studies will be required to determine whether manipulation of lignin contents or composition in plant vascular tissue could provide a novel avenue for modifying the rates of plant transpiration and improving drought tolerance.

The most striking phenotype of the *pal1 pal2* double mutants is the lack of flavonoid pigments. The seeds of three independent *pal1 pal2* double mutants are yellow (Fig. 3C; Supplemental Fig. S1C), apparently due to the lack of condensed tannin pigments in the seed coat (Fig. 3D). Unlike the wild type, the *pal1 pal2* mutant plants also accumulated little anthocyanin pigments when plants were grown in underfertilized and relatively low-temperature conditions (Fig. 3A; Supplemental Fig. S1A). Lack of condensed tannin and anthocyanin pigments in the *pal1 pal2* double mutants indicate that *PAL1* and *PAL2* have an important and redundant role in flavonoid biosynthesis. This macroscopic phenotype of the mutants was consistent with the previous molecular phenotyping that the *pal1-1 pal2-1* double mutant lacks three major flavonol glucosides (Rohde et al., 2004), which are the major UV light-absorbing compounds in *Arabidopsis*. Other UV light-protecting metabolites, such as sinapoyl Glc and sinapoyl malate, were not reduced in the leaves or inflorescence stem of the *pal1-1 pal2-1* mutant plants (Rohde et al., 2004). Thus, lack of flavonoid synthesis in the *pal1 pal2* double mutants is most likely responsible for its high sensitivity to UV-B light treatment. In addition, we have observed that the double mutant exhibited reduced tolerance to paraquat, which induces oxidative stress, and had substantially reduced seed longevity (Z. Chen, unpublished results).

The severe phenotypes of the *pal1 pal2* double mutants in flavonoid pigment accumulation illustrate the differential roles of different *PAL* isoforms in different branches of the phenylpropanoid pathway. It has been previously shown that increased flavonoid synthesis

in response to nitrogen deficiency and reduced temperature in Arabidopsis is associated with increased PAL activity and elevated levels of *PAL1* and *PAL2* transcripts (Olsen et al., 2008). Thus, *PAL1* and *PAL2* functional specialization in abiotic environment-triggered flavonoid synthesis may be attributed to their responsive expression, which would lead to increased PAL activity and elevated synthesis of trans-cinnamic acid. However, we were unable to rescue the phenotype of flavonoid pigment deficiency of the *pal1 pal2* double mutants by repeatedly feeding trans-cinnamic acid to the mutant plants. Likewise, feeding of trans-cinnamic acid or *para*-coumaric acid could not restore the kaempferol glycoside peaks in the *pal1-1 pal2-1* double mutant (Rohde et al., 2004). Thus, environment-triggered or tissue-specific flavonoid synthesis may require coordinated expression of not only *PAL1* and *PAL2* but also other genes involved in this specific branch of the phenylpropanoid pathway. Different isoforms of PAL may also differ in metabolite sensitivity, localization, and metabolite-channeling complexes, which could contribute to the differential roles of the protein family members in different branches of the phenylpropanoid pathway.

#### Roles of the PAL Gene Family in Plant Growth and Development

We have generated two independent sets of T-DNA/transposon insertion mutants for the four Arabidopsis PAL genes. Surprisingly, both quadruple mutants contained 7% to 9% of wild-type PAL activity (Fig. 2). The residual PAL activity in the quadruple mutants could be due to incomplete knockout of one or more of the four PAL genes in the mutants. Real-time PCR analysis detected very low levels of transcripts for the PAL genes (mostly less than 1%) in their respective homozygous single mutants and in the homozygous quadruple mutants (Fig. 1B). As a result, we were unable to identify any possible leaky mutants responsible for the residual PAL activity in the quadruple mutants. The very low levels of PAL transcripts in the mutants might be residual degradation products of PAL transcripts and, as such, may not even be functional mRNA. Thus, there is also a possibility that the residual PAL activity in the quadruple mutants is due to a novel plant PAL activity. The *pal1 pal2 pal3 pal4* quadruple mutant plants will facilitate the characterization and purification of the novel PAL activity, if it is indeed present in plants.

Although we failed to generate mutants completely deficient in PAL activity, the phenotypes of the two independent quadruple mutants with severely reduced PAL activity provided a glimpse into the roles of PAL in plant growth, development, and responses to environmental conditions. The quadruple mutants were severely stunted, particularly at early seedling stages, even with approximately 10% residual PAL activity. It is quite likely, therefore, that disruption of all PAL genes that completely eliminates PAL activity

may very well cause a lethal phenotype. In addition, we could not find any significant number of pollen grains from the *pal1 pal2 pal4* triple mutants and the *pal1 pal2 pal3 pal4* quadruple mutants, and these mutants are all sterile. Previously, it has been shown that antisense inhibition of flavonoid biosynthesis in petunia (*Petunia hybrida*) anthers causes male sterility (van der Meer et al., 1992). Both greatly reduced flavonoid biosynthesis in the *pal1 pal2 pal4* triple mutants and the *pal1 pal2 pal3 pal4* quadruple mutants could account for the sterile phenotypes of the mutants. These results support that the phenylpropanoid pathway is essential for plant growth and development.

Lignin has a negative effect on processing of plant biomass for biofuel production. Lignin contents in the *pal1 pal2* double and *pal1 pal2 pal3 pal4* quadruple mutants were reduced to only about 25% to 30% of wild-type levels in inflorescence stems (Rohde et al., 2004; Fig. 7), which would be beneficial for conversion to ethanol for biofuel crops. Despite the great reduction in lignin content, the mutants still produced rigid inflorescence stems (Figs. 3 and 7). Thus, a major reduction in lignin and other phenolic compounds in plant stem through manipulation of PAL genes did not appear to compromise severely the important mechanical property of the lignified tissues. These mutants, however, were compromised in growth, fertility, and tolerance to environmental stress. Many of these growth and developmental defects probably resulted from reduced phenolic compounds (e.g. flavonoids) derived from the phenylpropanoid pathway in non-lignified cells. Thus, tissue-specific manipulation of PAL genes in plant vascular tissues may improve plant biomass for biofuel such as ethanol production.

#### Phenylpropanoid Pathway and SA Biosynthesis

Several studies have shown that a high PAL activity is important for pathogen-induced SA formation in plants. In tobacco, the levels of free SA produced in both pathogen-inoculated and upper systemic leaves of PAL-silenced plants are roughly 4-fold lower than those in control plants (Pallas et al., 1996). Furthermore, the PAL inhibitor 2-aminoindan-2-phosphonic acid reduced pathogen- or pathogen elicitor-induced SA accumulation in potato, cucumber, and Arabidopsis (Meuwly et al., 1995; Mauch-Mani and Slusarenko, 1996; Coquoz et al., 1998). In this study, we observed that all tested *pal* single, double, and triple mutants accumulated normal basal and pathogen-induced SA levels (Fig. 8). On the other hand, the basal and pathogen-induced SA levels in the two *pal1 pal2 pal3 pal4* quadruple mutants were only about 25% and 50% of wild-type levels, respectively (Fig. 8). Since the quadruple mutants still contained about 10% of wild-type PAL activity, one can expect further reduction of SA accumulation if the PAL activity can be further reduced or completely abolished. Thus, our genetic analysis supports that the PAL activity is important for both basal and pathogen-induced SA

accumulation. However, since SA accumulation is affected only when the PAL activity is severely reduced in *Arabidopsis* (Fig. 8), it appears that the reaction catalyzed by PAL is not a rate-limiting step for the accumulation of SA.

In a number of plants, including tobacco, rice (*Oryza sativa*), and potato, biochemical studies using isotope feeding have suggested that plants can synthesize SA from benzoate, which is synthesized from chain-shortening reactions of cinnamate produced by PAL (Klambt, 1962; Yalpani et al., 1993; Leon et al., 1995; Silverman et al., 1995). In *Arabidopsis*, the *ics1 ics2* double mutant still accumulated about 4% of wild-type SA levels upon UV light exposure, and the phenylpropanoid pathway might be responsible for the synthesis of the residual SA in the double mutant. Since inhibition, silencing, or disruption of PAL activity or genes all have a major impact on SA accumulation, there must be other ways in which the phenylpropanoid pathway participates in SA biosynthesis and accumulation. For example, the PAL-dependent products may be involved in the generation of a precursor for SA biosynthesis. In bacteria, two enzymes catalyze the synthesis of SA from chorismate (Serino et al., 1995). ICS catalyzes the synthesis of isochorismate from chorismate, and isochorismate pyruvate lyase catalyzes the conversion of SA from isochorismate. Although plant ICS have been identified and analyzed, no plant isochorismate pyruvate lyase has been reported; therefore, how isochorismate is converted into SA in plants is still unknown. It is possible that isochorismate from the ICS pathway might not be directly converted into SA, as in bacteria, but instead might be conjugated with an intermediate from the phenylpropanoid pathway to produce an unknown SA precursor, analogous to the way in which intermediates of two different pathways are involved in lignin biosynthesis in the form of the phenylpropanoid intermediate *p*-coumaroylshikimate (Hoffmann et al., 2003). Indeed, we have recently shown that an *Arabidopsis* gene (*Enhanced Pseudomonas Susceptibility1*) encoding a BAHD acyltransferase is important for pathogen-induced SA accumulation (Zheng et al., 2009). The critical role of an acyltransferase in pathogen-induced SA accumulation is consistent with a possible integrated grid through formation of an ester conjugate from intermediates synthesized from two distinct pathways (Chen et al., 2009). Alternatively, the phenylpropanoid pathway may be responsible for the production of a regulatory molecule for SA biosynthesis or accumulation.

## MATERIALS AND METHODS

### Plant Growth Conditions

The *Arabidopsis* (*Arabidopsis thaliana*) wild type and *pal* mutants were grown in growth chambers at Purdue University or in a growth room at Zhejiang University at 22°C and 120  $\mu\text{E m}^{-2} \text{s}^{-1}$  light on a 12-h-light and 12-h-dark photoperiod.

### Isolation of *pal* Mutants

Homozygous *pal1*, *pal2*, *pal3*, and *pal4* mutant plants were identified by PCR using pairs of primers corresponding to sequences flanking the T-DNA insertions (Supplemental Table S3). The *pal* double, triple, and quadruple mutants were generated by genetic crossing. Homozygous *pal1 pal2* double mutant plants were identified from the F2 progeny by PCR genotyping using pairs of primers flanking the insertion sites. The *pal1 pal2* double mutants were then crossed with *pal3* and *pal4* to generate *pal1 pal2 pal3* and *pal1 pal2 pal4* triple mutants, respectively. The *pal1 pal2 pal3* triple mutants were crossed with *pal4* single mutants to generate *pal1 pal2 pal3 pal4* quadruple mutants. Since the *pal1 pal2 pal4* triple mutants and the *pal1 pal2 pal3 pal4* quadruple mutants are sterile, they were identified in the progeny of plants homozygous for the *pal1* and *pal4* mutations (for triple mutants) or homozygous for *pal1*, *pal3*, and *pal4* mutations (for quadruple mutants) but heterozygous for the *pal2* mutations. Heterozygous *pal2* mutants were identified by PCR using a combination of a T-DNA-specific primer (5'-TTGATTGGGTGATGGTTCA-3' for *pal2-2* and 5'-CCCATTGGACGTGAATGTAGACAC-3' for *pal2-3*) and a PAL2-specific primer (5'-CAATGGATCAAATCGAAGCA-3' for *pal2-2* and 5'-TATTCGGCGTTCAAAAATC-3' for *pal2-3*).

### RNA Isolation and RT-PCR

Total RNA was extracted with the RNeasy Plant Mini kit (Qiagen). RNA preparations were treated with DNase using the DNA-free kit from Ambion to remove contaminating DNA, and the treated RNA (1–5  $\mu\text{g}$ ) was subjected to RT using the SuperScript III first-strand synthesis system for RT-PCR (Invitrogen). Real-time PCR was conducted using SYBR PCR Master Mix (Applied Biosystems) and run on the ABI Prism 7000 system as described previously (Kim et al., 2008). The primers for the four PAL genes and ACT2 (At3g18780) for semiquantitative PCR were as described previously (Raes et al., 2003; Rohde et al., 2004). The primers for the four PAL genes for real-time PCR are listed in Supplemental Table S3.

### Assay of PAL Activity

PAL activity was determined as described previously (Rohde et al., 2004). Briefly, leaf and stem tissue samples were homogenized in 0.1 M sodium borate, pH 8.8, and centrifuged for 10 min at 4°C at 14,000 rpm. The supernatant was saved and determined for protein content using the Bradford procedure. The reaction mixture consisted of 25  $\mu\text{L}$  of protein supernatant (10–50  $\mu\text{g}$  of protein), 75  $\mu\text{L}$  of 0.1 M sodium borate, pH 8.8, 3  $\mu\text{L}$  of [ $^{14}\text{C}$ ]L-Phe (0.01  $\mu\text{Ci}$ ), and 5  $\mu\text{L}$  of 2 mM L-Phe. The reaction mixture was incubated at 37°C for 3 h. The reaction was stopped by adding 10  $\mu\text{L}$  of 10 N  $\text{H}_2\text{SO}_4$ . After adding 400  $\mu\text{L}$  of water, the mixture was extracted by adding 750  $\mu\text{L}$  of ether:cyclohexane mixture (1:1) and vortexing for 30 s. The organic phase was measured by a scintillation counter for the [ $^{14}\text{C}$ ]trans-cinnamic acid.

### Vanillin Assays

Immature seeds (approximately 7–10 d after pollination) were incubated in a solution of 1% (w/v) vanillin and 6 N HCl at room temperature for 10 to 20 min as described previously (Debeaujon et al., 2000).

### Pollen Collection and Counting

Anthers were removed from a fully open flower, and pollen grains were released into 50  $\mu\text{L}$  of 0.01% Silwet L-77 by gently squashing and agitating with a forceps. Pollen grains were counted with a hemocytometer using a microscope. Pollen grains were counted from 12 flowers for each genotype to increase the accuracy of the data.

### Analysis of Tolerance to UV-B Light Treatment

Four-week-old plants of Col-0 and *pal1 pal2* double mutants were irradiated with 1.24  $\mu\text{mol m}^{-2} \text{s}^{-1}$  UV-B light from four UV-B lamps (model BLE-1T158; Spectronics) for 4 h and then analyzed by chlorophyll fluorescence. Chlorophyll fluorescence was determined with an imaging pulse amplitude-modulated fluorometer (IMAG-MAXI; Heinz Walz). For measurement of  $F_v/F_m$ , plants were dark adapted for 30 min. Minimal fluorescence ( $F_0$ ) was

measured during the weak measuring pulses, and maximal fluorescence ( $F_m$ ) was measured by a 0.8-s pulse of light at about  $4,000 \mu\text{mol m}^{-2} \text{s}^{-1}$ . An actinic light source was then applied to obtain steady-state fluorescence yield ( $F_s$ ), after which a second saturation pulse was applied for 0.7 s to obtain light-adapted maximum fluorescence ( $F_m'$ ).  $F_v/F_m$ ,  $\Phi_{PSII}$ ,  $q_p$ , and NPQ were calculated as  $F_m - F_o/F_m'$ ,  $(F_m' - F_s)/F_m'$ ,  $(F_m' - F_s)/(F_m' - F_o)$ , and  $(F_m/F_m') - 1$ , respectively (Genty et al., 1989; Bilger and Bjorkman, 1990). In all cases, the whole plant was used as the area of interest.

## Analysis of Drought Tolerance

For testing drought tolerance, 7-week-old Arabidopsis plants (eight plants for each genotype) were transferred into a walk-in growth chamber with approximately 50% humidity. The plants were unwatered and observed for drought stress symptom development.

## Lignin Analysis

Cell wall isolation was performed as described previously (Rohde et al., 2004). Briefly, the inflorescence stems of 3-month-old plants of Col-0 wild type and *pal1 pal2 pal3 pal4* mutants were harvested individually. Stem pieces (1.5 g) were immediately frozen and ground in liquid nitrogen. After addition of 30 mL of 50 mM NaCl, the mixture was kept at 4°C overnight and then centrifuged for 10 min at 3,500 rpm. The pellet was extracted with 40 mL of 80% ethanol and sonicated for 20 min. This extraction was repeated twice. The same centrifugation, extraction, and sonication steps were performed with acetone, chloroform:methanol (1:1), and acetone. For measuring lignin content, the acetyl bromide-soluble lignin method was performed as described previously (Fukushima and Hatfield, 2001). The acetyl bromide-soluble lignin was calculated using an extinction coefficient of 17.2 (Rohde et al., 2004).

## SA Analysis

Pathogen inoculations were performed by infiltration of leaves of at least six plants (6–7 weeks old) for each treatment with the avirulent *Pseudomonas syringae* pv *tomato* DC3000 (*avrRpt2*) suspension in 10 mM MgCl<sub>2</sub> as described previously (Xu et al., 2006). Total SA content was determined with a biosensor strain *Acinetobacter* species, ADPWH\_lux, as described previously (Defraia et al., 2008). SA concentrations in the leaf samples were calculated based on the SA standard curve, which was constructed using the *sid2* mutant leaf extract.

## Pathogen Inoculation

Pathogen inoculations were performed by infiltration of leaves of at least six plants for each treatment with a suspension of the virulent *Pst* DC3000 strain in 10 mM MgCl<sub>2</sub>. For determining the bacterial growth, inoculated leaves were harvested at indicated days post inoculation and homogenized in 10 mM MgCl<sub>2</sub>. Diluted leaf extracts were plated on King's B medium supplemented with rifampicin (100  $\mu\text{g mL}^{-1}$ ) and kanamycin (25  $\mu\text{g mL}^{-1}$ ) and incubated at 25°C for 2 d before counting the colony-forming units as described previously (Xu et al., 2006). Inoculation of *Botrytis cinerea* was performed as described previously (Zheng et al., 2006).

## Supplemental Data

The following materials are available in the online version of this article.

**Supplemental Figure S1.** Phenotypes of the *pal1-1 pal2-1* double mutant.

**Supplemental Figure S2.** Inflorescences and siliques of wild-type and *pal1 pal2* double mutant plants grown under different light conditions.

**Supplemental Figure S3.** Responses to *B. cinerea*.

**Supplemental Table S1.** *pal* mutants analyzed in the study.

**Supplemental Table S2.** Pollen numbers of the wild type and *pal1 pal2* mutants.

**Supplemental Table S3.** Primers used for mutant identification and real-time PCR.

## ACKNOWLEDGMENTS

We thank the Arabidopsis Biological Resource Center at The Ohio State University and the Nottingham Arabidopsis Stock Centre for the T-DNA and transposon insertion mutants. We thank Dr. Wout Boerjan (Ghent University) for the *pal1-1* and *pal2-1* mutants. We are grateful to Hui Wang of the Natural Environment Research Council/Centre for Ecology and Hydrology (Oxford University) for the SA biosensor strain and Dr. Zhonglin Mou (University of Florida) for the assay protocol.

Received April 6, 2010; accepted June 18, 2010; published June 21, 2010.

## LITERATURE CITED

- Bilger W, Bjorkman O (1990) Role of the xanthophyll cycle in photo-protection elucidated by measurements of light-induced absorbance changes, fluorescence and photosynthesis in leaves of *Hedera canariensis*. *Photosynth Res* 25: 173–185
- Booij-James IS, Dube SK, Jansen MA, Edelman M, Mattoo AK (2000) Ultraviolet-B radiation impacts light-mediated turnover of the photosystem II reaction center heterodimer in Arabidopsis mutants altered in phenolic metabolism. *Plant Physiol* 124: 1275–1284
- Boudet AM (2007) Evolution and current status of research in phenolic compounds. *Phytochemistry* 68: 2722–2735
- Boyce CK, Zwieniecki MA, Cody GD, Jacobsen C, Wirick S, Knoll AH, Holbrook NM (2004) Evolution of xylem lignification and hydrogel transport regulation. *Proc Natl Acad Sci USA* 101: 17555–17558
- Catinot J, Buchala A, Abou-Mansour E, Metraux JP (2008) Salicylic acid production in response to biotic and abiotic stress depends on isochorismate in *Nicotiana benthamiana*. *FEBS Lett* 582: 473–478
- Chen Z, Zheng Z, Huang J, Lai Z, Fan B (2009) Biosynthesis of salicylic acid in plants. *Plant Signal Behav* 4: 493–496
- Coquoz JL, Buchala A, Metraux JP (1998) The biosynthesis of salicylic acid in potato plants. *Plant Physiol* 117: 1095–1101
- Debeaujon I, Leon-Kloosterziel KM, Koornneef M (2000) Influence of the testa on seed dormancy, germination, and longevity in Arabidopsis. *Plant Physiol* 122: 403–414
- Defraia CT, Schmelz EA, Mou Z (2008) A rapid biosensor-based method for quantification of free and glucose-conjugated salicylic acid. *Plant Methods* 4: 28
- Dixon RA, Paiva NL (1995) Stress-induced phenylpropanoid metabolism. *Plant Cell* 7: 1085–1097
- Edwards K, Cramer CL, Bolwell GP, Dixon RA, Schuch W, Lamb CJ (1985) Rapid transient induction of phenylalanine ammonia-lyase mRNA in elicitor-treated bean cells. *Proc Natl Acad Sci USA* 82: 6731–6735
- Elkind Y, Edwards R, Mavandad M, Hedrick SA, Ribak O, Dixon RA, Lamb CJ (1990) Abnormal plant development and down-regulation of phenylpropanoid biosynthesis in transgenic tobacco containing a heterologous phenylalanine ammonia-lyase gene. *Proc Natl Acad Sci USA* 87: 9057–9061
- Ferrer JL, Austin MB, Stewart C Jr, Noel JP (2008) Structure and function of enzymes involved in the biosynthesis of phenylpropanoids. *Plant Physiol Biochem* 46: 356–370
- Fukushima RS, Hatfield RD (2001) Extraction and isolation of lignin for utilization as a standard to determine lignin concentration using the acetyl bromide spectrophotometric method. *J Agric Food Chem* 49: 3133–3139
- Garcion C, Lohmann A, Lamodièrè E, Catinot J, Buchala A, Doermann P, Metraux JP (2008) Characterization and biological function of the *ISOCHORISMATE SYNTHASE2* gene of Arabidopsis. *Plant Physiol* 147: 1279–1287
- Genty B, Briatais JM, Baker NR (1989) The relationships between the quantum yield of photosynthetic electron transport and quenching of chlorophyll fluorescence. *Biochim Biophys Acta* 990: 87–92
- Hoffmann L, Maury S, Martz F, Geoffroy P, Legrand M (2003) Purification, cloning, and properties of an acyltransferase controlling shikimate and quinate ester intermediates in phenylpropanoid metabolism. *J Biol Chem* 278: 95–103
- Kenrick P, Crane PR (1997) The origin and early evolution of plants on land. *Nature* 389: 33–39
- Kim KC, Lai Z, Fan B, Chen Z (2008) Arabidopsis WRKY38 and WRKY62

- transcription factors interact with histone deacetylase 19 in basal defense. *Plant Cell* **20**: 2357–2371
- Klambt HD** (1962) Conversion in plants of benzoic acid to salicylic acid and its  $\beta$ -D-glucoside. *Nature* **196**: 491
- Lawton MA, Dixon RA, Hahlbrock K, Lamb C** (1983) Rapid induction of the synthesis of phenylalanine ammonia-lyase and of chalcone synthase in elicitor-treated plant cells. *Eur J Biochem* **129**: 593–601
- Leon J, Shulaev V, Yalpani N, Lawton MA, Raskin I** (1995) Benzoic acid 2-hydroxylase, a soluble oxygenase from tobacco, catalyzes salicylic acid biosynthesis. *Proc Natl Acad Sci USA* **92**: 10413–10417
- Liang XW, Dron M, Cramer CL, Dixon RA, Lamb CJ** (1989a) Differential regulation of phenylalanine ammonia-lyase genes during plant development and by environmental cues. *J Biol Chem* **264**: 14486–14492
- Liang XW, Dron M, Schmid J, Dixon RA, Lamb CJ** (1989b) Developmental and environmental regulation of a phenylalanine ammonia-lyase-beta-glucuronidase gene fusion in transgenic tobacco plants. *Proc Natl Acad Sci USA* **86**: 9284–9288
- Mauch-Mani B, Slusarenko AJ** (1996) Production of salicylic acid precursors is a major function of phenylalanine ammonia-lyase in the resistance of *Arabidopsis* to *Peronospora parasitica*. *Plant Cell* **8**: 203–212
- Meuwly P, Molders W, Buchala A, Metraux JP** (1995) Local and systemic biosynthesis of salicylic acid in infected cucumber plants. *Plant Physiol* **109**: 1107–1114
- Olsen KM, Lea US, Slimestad R, Verheul M, Lillo C** (2008) Differential expression of four *Arabidopsis* PAL genes: PAL1 and PAL2 have functional specialization in abiotic environmental-triggered flavonoid synthesis. *J Plant Physiol* **165**: 1491–1499
- Pallas JA, Paiva NL, Lamb C, Dixon RA** (1996) Tobacco plants epigenetically suppressed in phenylalanine ammonia-lyase expression do not develop systemic acquired resistance in response to infection by tobacco mosaic virus. *Plant J* **10**: 281–293
- Raes J, Rohde A, Christensen JH, Van de Peer Y, Boerjan W** (2003) Genome-wide characterization of the lignification toolbox in *Arabidopsis*. *Plant Physiol* **133**: 1051–1071
- Rohde A, Morreel K, Ralph J, Goeminne G, Hostyn V, De Rycke R, Kushnir S, Van Doorselaere J, Joseleau JP, Vuylsteke M, et al** (2004) Molecular phenotyping of the *pal1* and *pal2* mutants of *Arabidopsis thaliana* reveals far-reaching consequences on phenylpropanoid, amino acid, and carbohydrate metabolism. *Plant Cell* **16**: 2749–2771
- Segui JA, Maire V, Gabashvili IS, Fragata M** (2000) Oxygen evolution loss and structural transitions in photosystem II induced by low intensity UV-B radiation of 280 nm wavelength. *J Photochem Photobiol B* **56**: 39–47
- Serino L, Reimmann C, Baur H, Beyeler M, Visca P, Haas D** (1995) Structural genes for salicylate biosynthesis from chorismate in *Pseudomonas aeruginosa*. *Mol Gen Genet* **249**: 217–228
- Silverman P, Seskar M, Kanter D, Schweizer P, Metraux JP, Raskin I** (1995) Salicylic acid in rice: biosynthesis, conjugation and possible role. *Plant Physiol* **108**: 633–639
- van der Meer IM, Stam ME, van Tunen AJ, Mol JNM, Stuitje AR** (1992) Antisense inhibition of flavonoid biosynthesis in petunia anthers results in male sterility. *Plant Cell* **4**: 253–262
- Vass I, Kirilovsky D, Etienne AL** (1999) UV-B radiation-induced donor- and acceptor-side modifications of photosystem II in the cyanobacterium *Synechocystis* sp. PCC 6803. *Biochemistry* **38**: 12786–12794
- Waring J, Underwood GJ, Baker NR** (2006) Impact of elevated UV-B radiation on photosynthetic electron transport, primary productivity and carbon allocation in estuarine epipelagic diatoms. *Plant Cell Environ* **29**: 521–534
- Wildermuth MC, Dewdney J, Wu G, Ausubel FM** (2001) Isochorismate synthase is required to synthesize salicylic acid for plant defence. *Nature* **414**: 562–565
- Xu X, Chen C, Fan B, Chen Z** (2006) Physical and functional interactions between pathogen-induced *Arabidopsis* WRKY18, WRKY40, and WRKY60 transcription factors. *Plant Cell* **18**: 1310–1326
- Yalpani N, Leon J, Lawton MA, Raskin I** (1993) Pathway of salicylic acid biosynthesis in healthy and virus-inoculated tobacco. *Plant Physiol* **103**: 315–321
- Zheng Z, Qamar SA, Chen Z, Mengiste T** (2006) *Arabidopsis* WRKY33 transcription factor is required for resistance to necrotrophic fungal pathogens. *Plant J* **48**: 592–605
- Zheng Z, Qualley A, Fan B, Dudareva N, Chen Z** (2009) An important role of a BAHD acyl transferase-like protein in plant innate immunity. *Plant J* **57**: 1040–1053
